# Supplementary material for: Nutritional Differences between Two Orangutan Habitats: Implications for Population Density
Source: PubMed Central journal article supplement (PMC4605688; doi:10.1371/journal.pone.0138612), 2015-10-14
Supplement: pone.0138612.s002.pdf [file pone.0138612.s002.pdf]

**S1 Table.** Breakdown of the number of individuals in each sex class in this study

|                                                                | Sabangau            | Tuanan                |
|----------------------------------------------------------------|---------------------|-----------------------|
| Total Follow Hours 2003-2010                                   | 6976.9              | 25504.7               |
| Adult females                                                  | 6                   | 12                    |
| Nulliparous independent females                                | 5                   | 6                     |
| Flanged males                                                  | 13                  | 21                    |
| Unflanged males                                                | 9                   | 12                    |
| Number of births recorded since studies started<br>(June 2003) | 8 from 5<br>females | 16 from 12<br>females |
