# Supplementary material for: Nutritional Differences between Two Orangutan Habitats: Implications for Population Density
Source: PubMed Central journal article supplement (PMC4605688; doi:10.1371/journal.pone.0138612), 2015-10-14
Supplement: pone.0138612.s003.pdf [file pone.0138612.s003.pdf]

**S2 Table:** Site variation in daily caloric intake (using the high NDF coefficient of 1.6); FLM= flanged male; NUF = nulliparous independent female; UFM = unflanged adult male; AF = adult female; Age/Sex class comparisons are against AF. FAI = Percentage of fruiting trees

GAMM of Daily Caloric Intake (Kcal of OM); Random Effect = Orangutan ID;  
 Model offset = length of follow (min);  $r^2$  adj = 0.23; n=2826

| Variable             | mean ± SE | n    | estimate | SE     | t-stat | p-value |
|----------------------|-----------|------|----------|--------|--------|---------|
| <b>Site</b>          |           |      | 1903.49  | 165.55 | 11.49  | <0.0001 |
| Tuanan               | 3748.36   | 2208 |          |        |        |         |
| Sabangau             | 1707      | 624  |          |        |        |         |
| <b>FAI</b>           |           |      | 150.46   | 11.68  | 12.89  | <0.0001 |
| <b>Age/Sex Class</b> |           |      |          |        |        |         |
| FLM                  |           |      | -223.83  | 187.74 | -1.192 | 0.233   |
| NUF                  |           |      | -669.04  | 165.4  | -4.045 | <0.0001 |
| UFM                  |           |      | -66.84   | 210.58 | -0.317 | 0.751   |
